# Supplementary material
Source: PubMed Central journal article supplement (PMC6254335)

## Supporting information

### **Yes-associated protein (YAP) and transcriptional co-activator with PDZ-binding motif (TAZ) mediate cell density–dependent proinflammatory responses**

Qiong Zhang<sup>1, 2, 3</sup>, Xu Han<sup>1</sup>, Jinfeng Chen<sup>2</sup>, Xiaomei Xie<sup>1, 4</sup>, Jiafeng Xu<sup>1</sup>, Yang Zhao<sup>1</sup>, Jie Shen<sup>5</sup>, Lin Hu<sup>6</sup>, Pinglong Xu<sup>1</sup>, Hai Song<sup>1</sup>, Long Zhang<sup>1</sup>, Bin Zhao<sup>1</sup>, Ying-jie Wang<sup>3</sup>, Zongping Xia<sup>1, 2 \*</sup>

<sup>1</sup>Life Sciences Institute and Innovation Center for Cell Signaling Network, Zhejiang University, Hangzhou, 310058, Zhejiang, China.

<sup>2</sup>Translational Medicine Center, The First Affiliated Hospital of Zhengzhou University, Zhengzhou, 450052, Henan, China.

<sup>3</sup>State Key Laboratory for Diagnosis and Treatment of Infectious Diseases, The First Affiliated Hospital, College of Medicine, Zhejiang University, Hangzhou, 310003, Zhejiang, China.

<sup>4</sup>Youth League Committee of Zhejiang Gongshang University, Hangzhou, 310018, Zhejiang, China.

<sup>5</sup>Department of Medical Oncology, The first Affiliated Hospital, College of Medicine, Zhejiang University, Hangzhou, 310003, Zhejiang, China.

<sup>6</sup>Institutes of Biology and Medical Sciences, Soochow University, Suzhou, 215000, Jiangsu, China.

\*Correspondence to: Zongping Xia (email: [zxia2018@zzu.edu.cn](mailto:zxia2018@zzu.edu.cn)).

**This Supporting Information contains Table S1-S3 and Figure S1-S6.**

**Table S1 Related to Figure S7E** List of genes regulated by YAP/TAZ in top 15 pathways analyzed by KEGG pathway enrichment.

**YAP-5SA/GFP (vehicle)**

| <b>Influenza A; Q-value: 5.17886E-02</b>                          |                       |                     |                                           |
|-------------------------------------------------------------------|-----------------------|---------------------|-------------------------------------------|
| <b>Gene_symbol</b>                                                | <b>Entrez_gene_id</b> | <b>log2 (Ratio)</b> | <b>P-value (Differentially expressed)</b> |
| IRF9                                                              | 10379                 | -1.67191            | 0.001889                                  |
| DDX58                                                             | 23586                 | -1.05802            | 0.029097                                  |
| PYCARD                                                            | 29108                 | NA                  | NA                                        |
| HLA-DMB                                                           | 3109                  | -3.87203            | 2.55E-05                                  |
| HSPA1A                                                            | 3303                  | -1.17356            | 0.011811                                  |
| IL6                                                               | 3569                  | 3.402643            | 0.006632                                  |
| CXCL8                                                             | 3576                  | -2.17607            | 0.000657                                  |
| CXCL10                                                            | 3627                  | 2.263607            | 0.01033                                   |
| IRF7                                                              | 3665                  | -2.06141            | 0.000337                                  |
| MX1                                                               | 4599                  | -2.82545            | 6.14E-05                                  |
| MYD88                                                             | 4615                  | -1.68169            | 0.002626                                  |
| OAS1                                                              | 4938                  | -2.896              | 2.5E-05                                   |
| OAS2                                                              | 4939                  | -2.08107            | 0.002389                                  |
| OAS3                                                              | 4940                  | -1.57935            | 0.00223                                   |
| MAP2K3                                                            | 5606                  | 1.410369            | 0.024206                                  |
| MAP2K6                                                            | 5608                  | -1.98641            | 0.016837                                  |
| CCL2                                                              | 6347                  | -1.93681            | 0.000553                                  |
| CCL5                                                              | 6352                  | 3.862631            | 4.64E-06                                  |
| STAT1                                                             | 6772                  | -2.58406            | 5.73E-05                                  |
| TLR3                                                              | 7098                  | -1.61819            | 0.013925                                  |
| TNFSF10                                                           | 8743                  | -2.76945            | 0.002639                                  |
| TNFRSF10D                                                         | 8793                  | 1.936941            | 0.002414                                  |
| RSAD2                                                             | 91543                 | -1.71655            | 0.003356                                  |
|                                                                   |                       |                     |                                           |
| <b>Toll-like receptor signaling pathway; Q-value: 2.20246E-01</b> |                       |                     |                                           |
| <b>Gene_symbol</b>                                                | <b>Entrez_gene_id</b> | <b>log2 (Ratio)</b> | <b>P-value (Differentially expressed)</b> |
| MAP3K8                                                            | 1326                  | -1.48992            | 0.047178                                  |
| IL6                                                               | 3569                  | 3.402643            | 0.006632                                  |
| CXCL8                                                             | 3576                  | -2.17607            | 0.000657                                  |
| CXCL10                                                            | 3627                  | 2.263607            | 0.01033                                   |
| IRF7                                                              | 3665                  | -2.06141            | 0.000337                                  |
| MYD88                                                             | 4615                  | -1.68169            | 0.002626                                  |

|        |      |          |          |
|--------|------|----------|----------|
| MAP2K3 | 5606 | 1.410369 | 0.024206 |
| MAP2K6 | 5608 | -1.98641 | 0.016837 |
| CCL5   | 6352 | 3.862631 | 4.64E-06 |
| CXCL11 | 6373 | 2.387413 | 0.005897 |
| SPP1   | 6696 | -4.47849 | 3.62E-06 |
| STAT1  | 6772 | -2.58406 | 5.73E-05 |
| TLR3   | 7098 | -1.61819 | 0.013925 |
| CD14   | 929  | -1.77312 | 0.003001 |
| CD40   | 958  | -2.86863 | 0.008529 |
|        |      |          |          |

**Complement and coagulation cascades; Q-value: 3.07939E-01**

| Gene_symbol | Entrez_gene_id | log2 (Ratio) | P-value (Differentially expressed) |
|-------------|----------------|--------------|------------------------------------|
| CFD         | 1675           | -1.15359     | 0.022094                           |
| F2R         | 2149           | -2.4617      | 0.001469                           |
| FGA         | 2243           | -4.03717     | 0.000318                           |
| FGB         | 2244           | -2.96963     | 0.000816                           |
| FGG         | 2266           | -2.70874     | 0.023063                           |
| CFH         | 3075           | -3.70774     | 0.000623                           |
| SERPINE1    | 5054           | 1.188989     | 0.012013                           |
| PLAUR       | 5329           | 1.801838     | 0.001339                           |
| PROS1       | 5627           | 1.03167      | 0.028207                           |
| C3          | 718            | -1.77336     | 0.001041                           |
| C5          | 727            | -1.60811     | 0.003599                           |
|             |                |              |                                    |

**TNF signaling pathway; Q-value: 2.90287E-01**

| Gene_symbol | Entrez_gene_id | log2 (Ratio) | P-value (Differentially expressed) |
|-------------|----------------|--------------|------------------------------------|
| MAP3K8      | 1326           | -1.48992     | 0.047178                           |
| EDN1        | 1906           | -1.47144     | 0.003642                           |
| CXCL1       | 2919           | -1.44412     | 0.009717                           |
| IL6         | 3569           | 3.402643     | 0.006632                           |
| CXCL10      | 3627           | 2.263607     | 0.01033                            |
| MMP9        | 4318           | 1.500338     | 0.014066                           |
| MAP2K3      | 5606           | 1.410369     | 0.024206                           |
| MAP2K6      | 5608           | -1.98641     | 0.016837                           |
| PTGS2       | 5743           | -4.46222     | 2.3E-06                            |
| CCL2        | 6347           | -1.93681     | 0.000553                           |
| CCL5        | 6352           | 3.862631     | 4.64E-06                           |
| VCAM1       | 7412           | -2.47053     | 0.035259                           |

| CASP10                                                | 843                   | -2.56502            | 0.004974                                  |
|-------------------------------------------------------|-----------------------|---------------------|-------------------------------------------|
| RPS6KA4                                               | 8986                  | 1.420474            | 0.011852                                  |
|                                                       |                       |                     |                                           |
| <b>Herpes simplex infection; Q-value: 2.51256E-01</b> |                       |                     |                                           |
| <b>Gene_symbol</b>                                    | <b>Entrez_gene_id</b> | <b>log2 (Ratio)</b> | <b>P-value (Differentially expressed)</b> |
| IRF9                                                  | 10379                 | -1.67191            | 0.001889                                  |
| DDX58                                                 | 23586                 | -1.05802            | 0.029097                                  |
| HLA-DMB                                               | 3109                  | -3.87203            | 2.55E-05                                  |
| HLA-F                                                 | 3134                  | -1.2429             | 0.009888                                  |
| IFIT1                                                 | 3434                  | -1.22194            | 0.008995                                  |
| IL6                                                   | 3569                  | 3.402643            | 0.006632                                  |
| IRF7                                                  | 3665                  | -2.06141            | 0.000337                                  |
| MYD88                                                 | 4615                  | -1.68169            | 0.002626                                  |
| OAS1                                                  | 4938                  | -2.896              | 2.5E-05                                   |
| OAS2                                                  | 4939                  | -2.08107            | 0.002389                                  |
| OAS3                                                  | 4940                  | -1.57935            | 0.00223                                   |
| CCL2                                                  | 6347                  | -1.93681            | 0.000553                                  |
| CCL5                                                  | 6352                  | 3.862631            | 4.64E-06                                  |
| SKP2                                                  | 6502                  | 1.268765            | 0.007955                                  |
| STAT1                                                 | 6772                  | -2.58406            | 5.73E-05                                  |
| TLR3                                                  | 7098                  | -1.61819            | 0.013925                                  |
| TP53                                                  | 7157                  | 1.056805            | 0.02835                                   |
| C3                                                    | 718                   | -1.77336            | 0.001041                                  |
| C5                                                    | 727                   | -1.60811            | 0.003599                                  |
| PER2                                                  | 8864                  | -2.25016            | 0.005003                                  |
|                                                       |                       |                     |                                           |
| <b>Measles; Q-value: 2.0727E-01</b>                   |                       |                     |                                           |
| <b>Gene_symbol</b>                                    | <b>Entrez_gene_id</b> | <b>log2 (Ratio)</b> | <b>P-value (Differentially expressed)</b> |
| IRF9                                                  | 10379                 | -1.67191            | 0.001889                                  |
| DDX58                                                 | 23586                 | -1.05802            | 0.029097                                  |
| FYN                                                   | 2534                  | 3.680725            | 0.003164                                  |
| HSPA1A                                                | 3303                  | -1.17356            | 0.011811                                  |
| IL6                                                   | 3569                  | 3.402643            | 0.006632                                  |
| IRF7                                                  | 3665                  | -2.06141            | 0.000337                                  |
| JAK3                                                  | 3718                  | -1.12363            | 0.026577                                  |
| MX1                                                   | 4599                  | -2.82545            | 6.14E-05                                  |
| MYD88                                                 | 4615                  | -1.68169            | 0.002626                                  |
| OAS1                                                  | 4938                  | -2.896              | 2.5E-05                                   |

|           |      |          |          |
|-----------|------|----------|----------|
| OAS2      | 4939 | -2.08107 | 0.002389 |
| OAS3      | 4940 | -1.57935 | 0.00223  |
| STAT1     | 6772 | -2.58406 | 5.73E-05 |
| TP53      | 7157 | 1.056805 | 0.02835  |
| TNFSF10   | 8743 | -2.76945 | 0.002639 |
| TNFRSF10D | 8793 | 1.936941 | 0.002414 |
|           |      |          |          |

**Legionellosis; Q-value: 2.27865E-01**

| Gene_symbol | Entrez_gene_id | log2 (Ratio) | P-value (Differentially expressed) |
|-------------|----------------|--------------|------------------------------------|
| PYCARD      | 29108          | NA           | NA                                 |
| CXCL1       | 2919           | -1.44412     | 0.009717                           |
| HSPA1A      | 3303           | -1.17356     | 0.011811                           |
| IL6         | 3569           | 3.402643     | 0.006632                           |
| CXCL8       | 3576           | -2.17607     | 0.000657                           |
| ITGB2       | 3689           | 2.243522     | 0.0167                             |
| MYD88       | 4615           | -1.68169     | 0.002626                           |
| C3          | 718            | -1.77336     | 0.001041                           |
| CD14        | 929            | -1.77312     | 0.003001                           |
|             |                |              |                                    |

**Malaria; Q-value: 3.34329E-01**

| Gene_symbol | Entrez_gene_id | log2 (Ratio) | P-value (Differentially expressed) |
|-------------|----------------|--------------|------------------------------------|
| IL6         | 3569           | 3.402643     | 0.006632                           |
| CXCL8       | 3576           | -2.17607     | 0.000657                           |
| ITGB2       | 3689           | 2.243522     | 0.0167                             |
| MYD88       | 4615           | -1.68169     | 0.002626                           |
| CCL2        | 6347           | -1.93681     | 0.000553                           |
| SDC2        | 6383           | 3.683773     | 0.000184                           |
| VCAM1       | 7412           | -2.47053     | 0.035259                           |
| CD40        | 958            | -2.86863     | 0.008529                           |

**YAP-5SA/GFP (IL-1 $\beta$ )**

**Influenza A; Q-value: 9.1536E-03**

| Gene_symbol | Entrez_gene_id | log2 (Ratio) | P-value (Differentially expressed) |
|-------------|----------------|--------------|------------------------------------|
| IRF9        | 10379          | -1.54769     | 0.002933                           |
| IVNS1ABP    | 10625          | 1.279452     | 0.010992                           |
| DDX58       | 23586          | -1.15498     | 0.019203                           |
| HLA-DMB     | 3109           | -4.15021     | 2.11E-05                           |

|           |       |          |          |
|-----------|-------|----------|----------|
| FAS       | 355   | 1.623256 | 0.032451 |
| IL1A      | 3552  | -2.23937 | 0.010361 |
| IL6       | 3569  | 3.520328 | 1.66E-05 |
| CXCL8     | 3576  | -1.5937  | 0.001615 |
| IRF7      | 3665  | -2.32224 | 0.000138 |
| MX1       | 4599  | -3.07184 | 3.47E-05 |
| MYD88     | 4615  | -1.2105  | 0.017233 |
| OAS1      | 4938  | -2.62675 | 5E-05    |
| OAS2      | 4939  | -2.22045 | 0.001688 |
| OAS3      | 4940  | -1.40111 | 0.004743 |
| MAP2K6    | 5608  | -1.74665 | 0.022416 |
| CCL2      | 6347  | -2.73544 | 3.11E-05 |
| CCL5      | 6352  | 3.10744  | 1.56E-05 |
| STAT1     | 6772  | -2.1867  | 0.000192 |
| STAT2     | 6773  | -1.09412 | 0.024919 |
| TLR3      | 7098  | -1.32125 | 0.03906  |
| TNF       | 7124  | -1.2369  | 0.013186 |
| TNFSF10   | 8743  | -2.68104 | 0.003074 |
| TNFRSF10D | 8793  | 1.835328 | 0.005753 |
| RSAD2     | 91543 | -1.55062 | 0.008391 |
|           |       |          |          |

**Herpes simplex infection; Q-value: 2.77656E-02**

| <b>Gene_symbol</b> | <b>Entrez_gene_id</b> | <b>log2 (Ratio)</b> | <b>P-value (Differentially expressed)</b> |
|--------------------|-----------------------|---------------------|-------------------------------------------|
| IRF9               | 10379                 | -1.54769            | 0.002933                                  |
| DDX58              | 23586                 | -1.15498            | 0.019203                                  |
| HLA-DMB            | 3109                  | -4.15021            | 2.11E-05                                  |
| HLA-F              | 3134                  | -1.7526             | 0.019705                                  |
| IFIT1              | 3434                  | -2.12936            | 0.000183                                  |
| FAS                | 355                   | 1.623256            | 0.032451                                  |
| IL6                | 3569                  | 3.520328            | 1.66E-05                                  |
| IRF7               | 3665                  | -2.32224            | 0.000138                                  |
| MYD88              | 4615                  | -1.2105             | 0.017233                                  |
| OAS1               | 4938                  | -2.62675            | 5E-05                                     |
| OAS2               | 4939                  | -2.22045            | 0.001688                                  |
| OAS3               | 4940                  | -1.40111            | 0.004743                                  |
| CCL2               | 6347                  | -2.73544            | 3.11E-05                                  |
| CCL5               | 6352                  | 3.10744             | 1.56E-05                                  |
| SKP2               | 6502                  | 1.705008            | 0.001136                                  |
| STAT1              | 6772                  | -2.1867             | 0.000192                                  |

|       |      |          |          |
|-------|------|----------|----------|
| STAT2 | 6773 | -1.09412 | 0.024919 |
| TAP1  | 6890 | -1.03275 | 0.023139 |
| TLR3  | 7098 | -1.32125 | 0.03906  |
| TNF   | 7124 | -1.2369  | 0.013186 |
| C3    | 718  | -1.32662 | 0.007367 |
| C5    | 727  | -1.84659 | 0.001583 |
| PER2  | 8864 | -1.82877 | 0.025115 |
|       |      |          |          |

**Measles; Q-value: 4.66089E-02**

| <b>Gene_symbol</b> | <b>Entrez_gene_id</b> | <b>log2 (Ratio)</b> | <b>P-value (Differentially expressed)</b> |
|--------------------|-----------------------|---------------------|-------------------------------------------|
| IRF9               | 10379                 | -1.54769            | 0.002933                                  |
| DDX58              | 23586                 | -1.15498            | 0.019203                                  |
| FYN                | 2534                  | 4.229881            | 0.003173                                  |
| FAS                | 355                   | 1.623256            | 0.032451                                  |
| IL1A               | 3552                  | -2.23937            | 0.010361                                  |
| IL6                | 3569                  | 3.520328            | 1.66E-05                                  |
| IRF7               | 3665                  | -2.32224            | 0.000138                                  |
| MX1                | 4599                  | -3.07184            | 3.47E-05                                  |
| MYD88              | 4615                  | -1.2105             | 0.017233                                  |
| OAS1               | 4938                  | -2.62675            | 5E-05                                     |
| OAS2               | 4939                  | -2.22045            | 0.001688                                  |
| OAS3               | 4940                  | -1.40111            | 0.004743                                  |
| STAT1              | 6772                  | -2.1867             | 0.000192                                  |
| STAT2              | 6773                  | -1.09412            | 0.024919                                  |
| STAT5A             | 6776                  | -2.16035            | 0.000436                                  |
| TNFSF10            | 8743                  | -2.68104            | 0.003074                                  |
| TNFRSF10D          | 8793                  | 1.835328            | 0.005753                                  |
| CCND3              | 896                   | -1.31981            | 0.006268                                  |
|                    |                       |                     |                                           |

**Malaria; Q-value: 5.49832E-02**

| <b>Gene_symbol</b> | <b>Entrez_gene_id</b> | <b>log2 (Ratio)</b> | <b>P-value (Differentially expressed)</b> |
|--------------------|-----------------------|---------------------|-------------------------------------------|
| CSF3               | 1440                  | -1.09374            | 0.016929                                  |
| IL6                | 3569                  | 3.520328            | 1.66E-05                                  |
| CXCL8              | 3576                  | -1.5937             | 0.001615                                  |
| ITGB2              | 3689                  | 2.61115             | 0.002915                                  |
| MYD88              | 4615                  | -1.2105             | 0.017233                                  |
| CCL2               | 6347                  | -2.73544            | 3.11E-05                                  |
| SDC2               | 6383                  | 2.875647            | 0.008918                                  |

| TNF                                                               | 7124                  | -1.2369             | 0.013186                                  |
|-------------------------------------------------------------------|-----------------------|---------------------|-------------------------------------------|
| VCAM1                                                             | 7412                  | -3.30666            | 0.000981                                  |
| CD40                                                              | 958                   | -3.84823            | 0.001653                                  |
|                                                                   |                       |                     |                                           |
| <b>TNF signaling pathway; Q-value: 6.09995E-02</b>                |                       |                     |                                           |
| <b>Gene_symbol</b>                                                | <b>Entrez_gene_id</b> | <b>log2 (Ratio)</b> | <b>P-value (Differentially expressed)</b> |
| MAP3K8                                                            | 1326                  | -1.61687            | 0.005157                                  |
| EDN1                                                              | 1906                  | -1.41679            | 0.004536                                  |
| CXCL3                                                             | 2921                  | -1.30031            | 0.007155                                  |
| BIRC3                                                             | 330                   | -1.35607            | 0.005095                                  |
| FAS                                                               | 355                   | 1.623256            | 0.032451                                  |
| IL6                                                               | 3569                  | 3.520328            | 1.66E-05                                  |
| MMP9                                                              | 4318                  | 1.324193            | 0.026184                                  |
| MAP2K6                                                            | 5608                  | -1.74665            | 0.022416                                  |
| PTGS2                                                             | 5743                  | -3.67815            | 4.61E-06                                  |
| BCL3                                                              | 602                   | -2.05559            | 0.00029                                   |
| CCL2                                                              | 6347                  | -2.73544            | 3.11E-05                                  |
| CCL5                                                              | 6352                  | 3.10744             | 1.56E-05                                  |
| TNF                                                               | 7124                  | -1.2369             | 0.013186                                  |
| VCAM1                                                             | 7412                  | -3.30666            | 0.000981                                  |
| CASP10                                                            | 843                   | -2.37489            | 0.005197                                  |
|                                                                   |                       |                     |                                           |
| <b>Pertussis; Q-value: 7.10365E-02</b>                            |                       |                     |                                           |
| <b>Gene_symbol</b>                                                | <b>Entrez_gene_id</b> | <b>log2 (Ratio)</b> | <b>P-value (Differentially expressed)</b> |
| GNAI1                                                             | 2770                  | -1.05252            | 0.03876                                   |
| IL1A                                                              | 3552                  | -2.23937            | 0.010361                                  |
| IL6                                                               | 3569                  | 3.520328            | 1.66E-05                                  |
| CXCL8                                                             | 3576                  | -1.5937             | 0.001615                                  |
| IRF1                                                              | 3659                  | -1.81035            | 0.000775                                  |
| ITGB2                                                             | 3689                  | 2.61115             | 0.002915                                  |
| MYD88                                                             | 4615                  | -1.2105             | 0.017233                                  |
| CXCL5                                                             | 6374                  | -1.63301            | 0.001905                                  |
| TNF                                                               | 7124                  | -1.2369             | 0.013186                                  |
| C3                                                                | 718                   | -1.32662            | 0.007367                                  |
| C5                                                                | 727                   | -1.84659            | 0.001583                                  |
| CD14                                                              | 929                   | -1.70038            | 0.004159                                  |
|                                                                   |                       |                     |                                           |
| <b>Toll-like receptor signaling pathway; Q-value: 1.21805E-01</b> |                       |                     |                                           |



| Gene_symbol                                                      | Entrez_gene_id | log2 (Ratio) | P-value (Differentially expressed) |
|------------------------------------------------------------------|----------------|--------------|------------------------------------|
| MAP3K8                                                           | 1326           | -1.61687     | 0.005157                           |
| IL6                                                              | 3569           | 3.520328     | 1.66E-05                           |
| CXCL8                                                            | 3576           | -1.5937      | 0.001615                           |
| IRF7                                                             | 3665           | -2.32224     | 0.000138                           |
| MYD88                                                            | 4615           | -1.2105      | 0.017233                           |
| MAP2K6                                                           | 5608           | -1.74665     | 0.022416                           |
| CCL3                                                             | 6348           | 3.422669     | 0.035243                           |
| CCL5                                                             | 6352           | 3.10744      | 1.56E-05                           |
| SPP1                                                             | 6696           | -4.79375     | 2.78E-06                           |
| STAT1                                                            | 6772           | -2.1867      | 0.000192                           |
| TLR3                                                             | 7098           | -1.32125     | 0.03906                            |
| TNF                                                              | 7124           | -1.2369      | 0.013186                           |
| CD14                                                             | 929            | -1.70038     | 0.004159                           |
| CD40                                                             | 958            | -3.84823     | 0.001653                           |
|                                                                  |                |              |                                    |
| <b>African trypanosomiasis; Q-value: 1.75409E-01</b>             |                |              |                                    |
| Gene_symbol                                                      | Entrez_gene_id | log2 (Ratio) | P-value (Differentially expressed) |
| F2RL1                                                            | 2150           | -4.20107     | 2.08E-05                           |
| FAS                                                              | 355            | 1.623256     | 0.032451                           |
| IL6                                                              | 3569           | 3.520328     | 1.66E-05                           |
| IDO1                                                             | 3620           | -3.38948     | 0.011629                           |
| MYD88                                                            | 4615           | -1.2105      | 0.017233                           |
| TNF                                                              | 7124           | -1.2369      | 0.013186                           |
| VCAM1                                                            | 7412           | -3.30666     | 0.000981                           |
|                                                                  |                |              |                                    |
| <b>Complement and coagulation cascades; Q-value: 2.20432E-01</b> |                |              |                                    |
| Gene_symbol                                                      | Entrez_gene_id | log2 (Ratio) | P-value (Differentially expressed) |
| CFD                                                              | 1675           | -2.12549     | 0.000741                           |
| F2R                                                              | 2149           | -2.37275     | 0.002536                           |
| FGA                                                              | 2243           | -4.35858     | 0.000237                           |
| FGB                                                              | 2244           | -2.91212     | 0.000848                           |
| CFH                                                              | 3075           | -3.24738     | 0.001673                           |
| PLAUR                                                            | 5329           | 1.14676      | 0.023365                           |
| PROS1                                                            | 5627           | 1.329701     | 0.006905                           |
| BDKRB2                                                           | 624            | -2.17556     | 0.034946                           |
| C3                                                               | 718            | -1.32662     | 0.007367                           |

| C5                                        | 727            | -1.84659     | 0.001583                           |
|-------------------------------------------|----------------|--------------|------------------------------------|
| <b>Hepatitis B; Q-value: 3.27804E-01</b>  |                |              |                                    |
| Gene_symbol                               | Entrez_gene_id | log2 (Ratio) | P-value (Differentially expressed) |
| DDX58                                     | 23586          | -1.15498     | 0.019203                           |
| FAS                                       | 355            | 1.623256     | 0.032451                           |
| IL6                                       | 3569           | 3.520328     | 1.66E-05                           |
| CXCL8                                     | 3576           | -1.5937      | 0.001615                           |
| IRF7                                      | 3665           | -2.32224     | 0.000138                           |
| MMP9                                      | 4318           | 1.324193     | 0.026184                           |
| MYD88                                     | 4615           | -1.2105      | 0.017233                           |
| SRC                                       | 6714           | -1.2605      | 0.013069                           |
| STAT1                                     | 6772           | -2.1867      | 0.000192                           |
| STAT2                                     | 6773           | -1.09412     | 0.024919                           |
| STAT4                                     | 6775           | -2.64139     | 0.000525                           |
| STAT5A                                    | 6776           | -2.16035     | 0.000436                           |
| TLR3                                      | 7098           | -1.32125     | 0.03906                            |
| TNF                                       | 7124           | -1.2369      | 0.013186                           |
| CASP10                                    | 843            | -2.37489     | 0.005197                           |
| <b>Legionellosis; Q-value: 3.3643E-01</b> |                |              |                                    |
| Gene_symbol                               | Entrez_gene_id | log2 (Ratio) | P-value (Differentially expressed) |
| CXCL3                                     | 2921           | -1.30031     | 0.007155                           |
| IL6                                       | 3569           | 3.520328     | 1.66E-05                           |
| CXCL8                                     | 3576           | -1.5937      | 0.001615                           |
| ITGB2                                     | 3689           | 2.61115      | 0.002915                           |
| MYD88                                     | 4615           | -1.2105      | 0.017233                           |
| TNF                                       | 7124           | -1.2369      | 0.013186                           |
| C3                                        | 718            | -1.32662     | 0.007367                           |
| CD14                                      | 929            | -1.70038     | 0.004159                           |

**YAP-5SA/GFP (TNF $\alpha$ )**

| <b>Influenza A; Q-value: 1.7375E-01</b> |                |              |                                    |
|-----------------------------------------|----------------|--------------|------------------------------------|
| Gene_symbol                             | Entrez_gene_id | log2 (Ratio) | P-value (Differentially expressed) |
| IRF9                                    | 10379          | -1.06426     | 0.03467                            |
| IVNS1ABP                                | 10625          | 1.708614     | 0.002088                           |
| EIF2AK1                                 | 27102          | -1.27248     | 0.019058                           |

|                                                                  |                       |                     |                                           |
|------------------------------------------------------------------|-----------------------|---------------------|-------------------------------------------|
| PYCARD                                                           | 29108                 | NA                  | NA                                        |
| HLA-DMB                                                          | 3109                  | -4.7543             | 1.63E-05                                  |
| HSPA2                                                            | 3306                  | -1.52657            | 0.002519                                  |
| ICAM1                                                            | 3383                  | -1.69794            | 0.038916                                  |
| IFNAR2                                                           | 3455                  | -1.33355            | 0.020802                                  |
| IFNGR1                                                           | 3459                  | -1.21821            | 0.016418                                  |
| IL6                                                              | 3569                  | 2.764161            | 0.000186                                  |
| CXCL8                                                            | 3576                  | -2.28294            | 0.000109                                  |
| IRF7                                                             | 3665                  | -1.8443             | 0.000922                                  |
| EIF2AK4                                                          | 440275                | 1.214541            | 0.023646                                  |
| MX1                                                              | 4599                  | -2.90645            | 5.87E-05                                  |
| OAS1                                                             | 4938                  | -2.51262            | 8.09E-05                                  |
| OAS2                                                             | 4939                  | -2.0704             | 0.00329                                   |
| OAS3                                                             | 4940                  | -1.24662            | 0.010581                                  |
| CCL2                                                             | 6347                  | -2.5755             | 4.61E-05                                  |
| CCL5                                                             | 6352                  | 3.241986            | 1.16E-05                                  |
| STAT1                                                            | 6772                  | -1.85648            | 0.000771                                  |
| TNF                                                              | 7124                  | -1.38582            | 0.010494                                  |
| TNFSF10                                                          | 8743                  | -3.13985            | 0.002389                                  |
| RSAD2                                                            | 91543                 | -1.21691            | 0.032577                                  |
|                                                                  |                       |                     |                                           |
| <b>Complement and coagulation cascades; Q-value: 9.55349E-02</b> |                       |                     |                                           |
| <b>Gene_symbol</b>                                               | <b>Entrez_gene_id</b> | <b>log2 (Ratio)</b> | <b>P-value (Differentially expressed)</b> |
| CFD                                                              | 1675                  | -1.8051             | 0.001534                                  |
| F2R                                                              | 2149                  | -2.6669             | 0.001819                                  |
| FGA                                                              | 2243                  | -4.94364            | 7.41E-05                                  |
| FGB                                                              | 2244                  | -2.84381            | 0.002551                                  |
| FGG                                                              | 2266                  | -3.97925            | 0.008753                                  |
| CFH                                                              | 3075                  | -3.89436            | 0.001124                                  |
| SERPINE1                                                         | 5054                  | 1.05809             | 0.022043                                  |
| PLAUR                                                            | 5329                  | 1.266832            | 0.018217                                  |
| PROS1                                                            | 5627                  | 1.914723            | 0.000588                                  |
| BDKRB2                                                           | 624                   | -2.53174            | 0.040739                                  |
| C3                                                               | 718                   | -1.67141            | 0.001766                                  |
| C5                                                               | 727                   | -2.36857            | 0.000232                                  |
| CD59                                                             | 966                   | 1.07774             | 0.018749                                  |
|                                                                  |                       |                     |                                           |
| <b>Herpes simplex infection; Q-value: 1.17698E-01</b>            |                       |                     |                                           |

| <b>Gene_symbol</b>                                 | <b>Entrez_gene_id</b> | <b>log2 (Ratio)</b> | <b>P-value (Differentially expressed)</b> |
|----------------------------------------------------|-----------------------|---------------------|-------------------------------------------|
| IRF9                                               | 10379                 | -1.06426            | 0.03467                                   |
| EIF2AK1                                            | 27102                 | -1.27248            | 0.019058                                  |
| HLA-DMB                                            | 3109                  | -4.7543             | 1.63E-05                                  |
| HLA-F                                              | 3134                  | -1.38961            | 0.045378                                  |
| IFIT1                                              | 3434                  | -1.64557            | 0.001255                                  |
| IFNAR2                                             | 3455                  | -1.33355            | 0.020802                                  |
| IFNGR1                                             | 3459                  | -1.21821            | 0.016418                                  |
| IL6                                                | 3569                  | 2.764161            | 0.000186                                  |
| IRF7                                               | 3665                  | -1.8443             | 0.000922                                  |
| EIF2AK4                                            | 440275                | 1.214541            | 0.023646                                  |
| OAS1                                               | 4938                  | -2.51262            | 8.09E-05                                  |
| OAS2                                               | 4939                  | -2.0704             | 0.00329                                   |
| OAS3                                               | 4940                  | -1.24662            | 0.010581                                  |
| CCL2                                               | 6347                  | -2.5755             | 4.61E-05                                  |
| CCL5                                               | 6352                  | 3.241986            | 1.16E-05                                  |
| SKP2                                               | 6502                  | 1.763521            | 0.000876                                  |
| STAT1                                              | 6772                  | -1.85648            | 0.000771                                  |
| TNF                                                | 7124                  | -1.38582            | 0.010494                                  |
| C3                                                 | 718                   | -1.67141            | 0.001766                                  |
| C5                                                 | 727                   | -2.36857            | 0.000232                                  |
| CUL1                                               | 8454                  | -1.27412            | 0.014971                                  |
| TNFSF14                                            | 8740                  | -2.74894            | 0.022745                                  |
| PER2                                               | 8864                  | -2.53657            | 0.005645                                  |
|                                                    |                       |                     |                                           |
| <b>TNF signaling pathway; Q-value: 1.02053E-01</b> |                       |                     |                                           |
| <b>Gene_symbol</b>                                 | <b>Entrez_gene_id</b> | <b>log2 (Ratio)</b> | <b>P-value (Differentially expressed)</b> |
| MAP3K8                                             | 1326                  | -1.41688            | 0.014597                                  |
| EDN1                                               | 1906                  | -1.96767            | 0.000435                                  |
| CXCL3                                              | 2921                  | -1.99073            | 0.000456                                  |
| BIRC2                                              | 329                   | -1.16874            | 0.013764                                  |
| BIRC3                                              | 330                   | -1.63126            | 0.001474                                  |
| ICAM1                                              | 3383                  | -1.69794            | 0.038916                                  |
| IL6                                                | 3569                  | 2.764161            | 0.000186                                  |
| MMP9                                               | 4318                  | 1.543945            | 0.011919                                  |
| PTGS2                                              | 5743                  | -4.20504            | 2.5E-06                                   |
| BCL3                                               | 602                   | -1.37595            | 0.00628                                   |
| CCL2                                               | 6347                  | -2.5755             | 4.61E-05                                  |

| CCL5                                                      | 6352                  | 3.241986            | 1.16E-05                                  |
|-----------------------------------------------------------|-----------------------|---------------------|-------------------------------------------|
| CCL20                                                     | 6364                  | -1.35706            | 0.004692                                  |
| TNF                                                       | 7124                  | -1.38582            | 0.010494                                  |
| VCAM1                                                     | 7412                  | -2.85812            | 0.004471                                  |
| CASP10                                                    | 843                   | -2.44446            | 0.008366                                  |
|                                                           |                       |                     |                                           |
| <b>NF-kappa B signaling pathway; Q-value: 1.00301E-01</b> |                       |                     |                                           |
| <b>Gene_symbol</b>                                        | <b>Entrez_gene_id</b> | <b>log2 (Ratio)</b> | <b>P-value (Differentially expressed)</b> |
| BIRC2                                                     | 329                   | -1.16874            | 0.013764                                  |
| BIRC3                                                     | 330                   | -1.63126            | 0.001474                                  |
| XIAP                                                      | 331                   | -1.31205            | 0.006982                                  |
| ICAM1                                                     | 3383                  | -1.69794            | 0.038916                                  |
| IL1R1                                                     | 3554                  | -1.35075            | 0.030884                                  |
| CXCL8                                                     | 3576                  | -2.28294            | 0.000109                                  |
| PTGS2                                                     | 5743                  | -4.20504            | 2.5E-06                                   |
| TNF                                                       | 7124                  | -1.38582            | 0.010494                                  |
| UBE2I                                                     | 7329                  | -1.06252            | 0.019886                                  |
| VCAM1                                                     | 7412                  | -2.85812            | 0.004471                                  |
| TNFSF14                                                   | 8740                  | -2.74894            | 0.022745                                  |
| TNFRSF11A                                                 | 8792                  | 1.202901            | 0.037273                                  |
| CD14                                                      | 929                   | -1.35677            | 0.017607                                  |
| CD40                                                      | 958                   | -4.28264            | 0.000581                                  |
|                                                           |                       |                     |                                           |
| <b>Legionellosis; Q-value: 1.41693E-01</b>                |                       |                     |                                           |
| <b>Gene_symbol</b>                                        | <b>Entrez_gene_id</b> | <b>log2 (Ratio)</b> | <b>P-value (Differentially expressed)</b> |
| PYCARD                                                    | 29108                 | NA                  | NA                                        |
| CXCL3                                                     | 2921                  | -1.99073            | 0.000456                                  |
| HSPA2                                                     | 3306                  | -1.52657            | 0.002519                                  |
| IL6                                                       | 3569                  | 2.764161            | 0.000186                                  |
| CXCL8                                                     | 3576                  | -2.28294            | 0.000109                                  |
| ITGB2                                                     | 3689                  | 2.701684            | 0.006417                                  |
| ARF1                                                      | 375                   | -1.10332            | 0.02624                                   |
| TNF                                                       | 7124                  | -1.38582            | 0.010494                                  |
| C3                                                        | 718                   | -1.67141            | 0.001766                                  |
| CD14                                                      | 929                   | -1.35677            | 0.017607                                  |
|                                                           |                       |                     |                                           |
| <b>Measles; Q-value: 1.64856E-01</b>                      |                       |                     |                                           |

| Gene_symbol                           | Entrez_gene_id | log2 (Ratio) | P-value (Differentially expressed) |
|---------------------------------------|----------------|--------------|------------------------------------|
| IRF9                                  | 10379          | -1.06426     | 0.03467                            |
| FYN                                   | 2534           | 3.603977     | 0.00386                            |
| EIF2AK1                               | 27102          | -1.27248     | 0.019058                           |
| HSPA2                                 | 3306           | -1.52657     | 0.002519                           |
| IFNAR2                                | 3455           | -1.33355     | 0.020802                           |
| IFNGR1                                | 3459           | -1.21821     | 0.016418                           |
| IL6                                   | 3569           | 2.764161     | 0.000186                           |
| IRF7                                  | 3665           | -1.8443      | 0.000922                           |
| EIF2AK4                               | 440275         | 1.214541     | 0.023646                           |
| MX1                                   | 4599           | -2.90645     | 5.87E-05                           |
| OAS1                                  | 4938           | -2.51262     | 8.09E-05                           |
| OAS2                                  | 4939           | -2.0704      | 0.00329                            |
| OAS3                                  | 4940           | -1.24662     | 0.010581                           |
| STAT1                                 | 6772           | -1.85648     | 0.000771                           |
| STAT5A                                | 6776           | -2.05106     | 0.000754                           |
| TNFSF10                               | 8743           | -3.13985     | 0.002389                           |
| CCND3                                 | 896            | -1.47854     | 0.002828                           |
|                                       |                |              |                                    |
| <b>Malaria; Q-value: 2.00611E-01</b>  |                |              |                                    |
| Gene_symbol                           | Entrez_gene_id | log2 (Ratio) | P-value (Differentially expressed) |
| ICAM1                                 | 3383           | -1.69794     | 0.038916                           |
| IL6                                   | 3569           | 2.764161     | 0.000186                           |
| CXCL8                                 | 3576           | -2.28294     | 0.000109                           |
| ITGB2                                 | 3689           | 2.701684     | 0.006417                           |
| CCL2                                  | 6347           | -2.5755      | 4.61E-05                           |
| SDC2                                  | 6383           | 2.882383     | 0.001258                           |
| TNF                                   | 7124           | -1.38582     | 0.010494                           |
| VCAM1                                 | 7412           | -2.85812     | 0.004471                           |
| CD40                                  | 958            | -4.28264     | 0.000581                           |
|                                       |                |              |                                    |
| <b>Pertussis; Q-value: 2.5183E-01</b> |                |              |                                    |
| Gene_symbol                           | Entrez_gene_id | log2 (Ratio) | P-value (Differentially expressed) |
| GNAI1                                 | 2770           | -1.20037     | 0.020327                           |
| PYCARD                                | 29108          | NA           | NA                                 |
| IL6                                   | 3569           | 2.764161     | 0.000186                           |
| CXCL8                                 | 3576           | -2.28294     | 0.000109                           |

| IRF1                                              | 3659                  | -1.41752            | 0.003868                                  |
|---------------------------------------------------|-----------------------|---------------------|-------------------------------------------|
| ITGB2                                             | 3689                  | 2.701684            | 0.006417                                  |
| CXCL5                                             | 6374                  | -1.87641            | 0.000835                                  |
| TNF                                               | 7124                  | -1.38582            | 0.010494                                  |
| C3                                                | 718                   | -1.67141            | 0.001766                                  |
| C5                                                | 727                   | -2.36857            | 0.000232                                  |
| CD14                                              | 929                   | -1.35677            | 0.017607                                  |
|                                                   |                       |                     |                                           |
| <b>Rheumatoid arthritis; Q-value: 2.67507E-01</b> |                       |                     |                                           |
| <b>Gene_symbol</b>                                | <b>Entrez_gene_id</b> | <b>log2 (Ratio)</b> | <b>P-value (Differentially expressed)</b> |
| HLA-DMB                                           | 3109                  | -4.7543             | 1.63E-05                                  |
| ICAM1                                             | 3383                  | -1.69794            | 0.038916                                  |
| IL6                                               | 3569                  | 2.764161            | 0.000186                                  |
| CXCL8                                             | 3576                  | -2.28294            | 0.000109                                  |
| ITGB2                                             | 3689                  | 2.701684            | 0.006417                                  |
| CCL2                                              | 6347                  | -2.5755             | 4.61E-05                                  |
| CCL5                                              | 6352                  | 3.241986            | 1.16E-05                                  |
| CCL20                                             | 6364                  | -1.35706            | 0.004692                                  |
| CXCL5                                             | 6374                  | -1.87641            | 0.000835                                  |
| TNF                                               | 7124                  | -1.38582            | 0.010494                                  |
| TNFRSF11A                                         | 8792                  | 1.202901            | 0.037273                                  |
| ATP6V1F                                           | 9296                  | -1.04461            | 0.023304                                  |

**Table S2 Related to Materials and Methods** List of oligos used in this study.

| <b>RNAi</b> | <b>Sequence</b>           | <b>Species</b> |
|-------------|---------------------------|----------------|
| LATS1       | CCUCCAUAACGAGUCAAAUCAdTdT | Human          |
| LATS2       | CAAGCAUCCUGAGCACGCAdTdT   | Human          |
| YAP         | CCACCAAGCUAGAUAAGAdTdT    | Human          |
| TAZ         | CCGCAGGGCTCATGAGTATdTdT   | Human          |
| TEAD1/3/4   | GAUCAACUUCAUCCACAAGCUdTdT | Human          |
| HDAC4       | CGACAGGCCUCGUGUAUGAdTdT   | Human          |
| HDAC6       | CUGCAAGGGAUGGAUCUGAdTdT   | Human          |
| HDAC7       | GGACAAGAGCAAGCGAAGUdTdT   | Human          |
| HDAC11      | GGGCUACCAUCAUUGAUCUdTdT   | Human          |
| MST1        | CAAGCGAAAACAGUGAUdTdT     | Human          |
| MST2        | CAGCACUGAAGGGCUUUAUdTdT   | Human          |
|             |                           |                |

| <b>qPCR Primers</b>                  | <b>Sequence</b>         | <b>Species</b> |
|--------------------------------------|-------------------------|----------------|
| COX-2 forward primer                 | CGGTGAAACTCTGGCTAGACAG  | Human          |
| COX-2 reverse primer                 | GCAAACCGTAGATGCTCAGGGA  | Human          |
| GAPDH forward primer                 | GTCTCCTCTGACTTCAACAGCG  | Human          |
| GAPDH reverse primer                 | ACCACCCTGTTGCTGTAGCCAA  | Human          |
| COX-1 forward primer                 | GATGAGCAGCTTTTCCAGACGAC | Human          |
| COX-1 reverse primer                 | AACTGGACACCGAACAGCAGCT  | Human          |
| I $\kappa$ B $\alpha$ forward primer | TCCACTCCATCCTGAAGGCTAC  | Human          |
| I $\kappa$ B $\alpha$ reverse primer | CAAGGACACCAAAAGCTCCACG  | Human          |
| A20 forward primer                   | CTCAACTGGTGTGCGAGAAGTCC | Human          |
| A20 reverse primer                   | TTCCTTGAGCGTGCTGAACAGC  | Human          |
| CTGF forward primer                  | CTTGCGAAGCTGACCTGGAAGA  | Human          |
| CTGF reverse primer                  | CCGTCGGTACATACTCCACAGA  | Human          |
| TEAD1 forward primer                 | CCTGGCTATCTATCCACCATGTG | Human          |
| TEAD1 reverse primer                 | TTCTGGTCCTCGTCTTGCCCTGT | Human          |
| LATS1 forward primer                 | CACTGGCTTCAGATGGACACAC  | Human          |
| LATS1 reverse primer                 | GGCTTCAGTCTGTCTCCACATC  | Human          |
| HDAC4 forward primer                 | AGGTGAAGCAGGAGCCCATTGA  | Human          |
| HDAC4 reverse primer                 | GGTAGTTCCTCAGCTGGTGGAT  | Human          |
| HDAC6 forward primer                 | GCCTCAATCACTGAGACCATCC  | Human          |
| HDAC6 reverse primer                 | GGTGCCTTCTTGGTGACCAACT  | Human          |
| HDAC7 forward primer                 | TCCTGGCACAGCGGATGTTTGT  | Human          |
| HDAC7 reverse primer                 | TGAAGGCGAGGTCAGTGACACT  | Human          |
| HDAC11 forward primer                | CTTCTGTGCCTATGCGGACATC  | Human          |
| HDAC11 reverse primer                | GAAGTCTCGCTCATGCCCATTG  | Human          |
| IL6 forward primer                   | AGACAGCCACTCACCTCTTCAG  | Human          |
| IL6 reverse primer                   | TTCTGCCAGTGCCTCTTTGCTG  | Human          |



|                                        |                            |                |
|----------------------------------------|----------------------------|----------------|
| TRAF1 forward primer                   | CGATGGCACTTTCCTGTGGAAG     | Human          |
| TRAF1 reverse primer                   | TACAGCCGCAGGCACAACCTTGT    | Human          |
|                                        |                            |                |
| <b>ChIP-qPCR Primers</b>               | <b>Sequence</b>            | <b>Species</b> |
| COX-2 (-0.6kb) promoter forward primer | GGGTGAAGGTACGGAGAACAGT     | Human          |
| COX-2 (-0.6kb) promoter reverse primer | TGTTTTATGTTTTAGTGACGACGC   | Human          |
| COX-2 (-1.5kb) promoter forward primer | TTCAGTAGATGCAACCTACTCCTTTA | Human          |
| COX-2 (-1.5kb) promoter reverse primer | TTCCATCTCATCTAGGAAGCCTT    | Human          |
|                                        |                            |                |
| <b>guide RNA</b>                       | <b>sequence</b>            | <b>Species</b> |
| HDAC7                                  | accgcctgcagcagcagcgcctcgg  | Human          |

**Table S3 Related to Materials and Methods** List of antibodies used in this study.

| Antibody                   | Company | Catalog # | Species | Clone      | Dilution |       |      |
|----------------------------|---------|-----------|---------|------------|----------|-------|------|
|                            |         |           |         |            | WB       | IF    | CHIP |
| Primary antibodies         |         |           |         |            |          |       |      |
| anti-COX-2                 | CST     | 12282     | Rabbit  | Monoclonal | 1:1000   | 1:500 |      |
| anti-YAP/TAZ               | CST     | 8418      | Rabbit  | Monoclonal | 1:1000   |       |      |
| anti-I $\kappa$ B $\alpha$ | CST     | 9242      | Rabbit  | Polyclonal | 1:1000   |       |      |
| anti-Lats1                 | CST     | 9153      | Rabbit  | Monoclonal | 1:1000   |       |      |
| anti-TEAD1                 | CST     | 12292     | Rabbit  | Monoclonal | 1:1000   |       |      |
| anti-A20                   | CST     | 5630      | Rabbit  | Monoclonal | 1:1000   |       |      |
| anti-CYLD                  | CST     | 8462      | Rabbit  | Monoclonal | 1:1000   |       |      |
| anti-CYR61                 | CST     | 14479     | Rabbit  | Monoclonal | 1:1000   |       |      |

|                                                           |                          |           |        |            |         |       |       |
|-----------------------------------------------------------|--------------------------|-----------|--------|------------|---------|-------|-------|
| anti-CTGF                                                 | Santa Cruz               | sc-14939  | Mouse  | Polyclonal | 1:1000  |       |       |
| anti-YAP                                                  | CST                      | 14074     | Rabbit | Monoclonal |         |       | 1:100 |
| anti-HDAC7                                                | abcam                    | ab50212   | Mouse  | Monoclonal | 1:2000  |       | 1:200 |
| anti-YAP1                                                 | abcam                    | ab56701   | Mouse  | Monoclonal |         | 1:200 |       |
| anti-GAPDH                                                | HuaAn                    | M1211-1   | Rabbit | Polyclonal | 1:2000  |       |       |
| anti-MST1                                                 | abcam                    | ab124787, | Rabbit | Monoclonal | 1:1000  |       |       |
| anti-MST2                                                 | abcam                    | ab52641   | Rabbit | Monoclonal | 1:1000  |       |       |
| anti-Flag                                                 | abmart                   | M20008    | Mouse  | Monoclonal | 1:5000  |       |       |
| anti-HA                                                   | abmart                   | M20003    | Mouse  | Monoclonal | 1:5000  |       |       |
| anti-Myc                                                  | abmart                   | M20002    | Mouse  | Monoclonal | 1:5000  |       |       |
|                                                           |                          |           |        |            |         |       |       |
| Secondary antibodies                                      |                          |           |        |            |         |       |       |
| anti-rabbit IgG-conjugated alkaline phosphatase conjugate | Promega                  | S373B     |        |            | 1:10000 |       |       |
| anti-mouse IgG-conjugated alkaline phosphatase conjugate  | Promega                  | S372B     |        |            | 1:10000 |       |       |
| anti-Rabbit IgG secondary Antibody, Alexa Fluor 488       | Thermo Fisher Scientific | R37118    |        |            | 1:2000  |       |       |
| anti-mouse IgG secondary Antibody, Alexa Fluor 594        | Thermo Fisher Scientific | R37115    |        |            | 1:2000  |       |       |

**Supplementary Figure S1. Cell density regulates COX-2 induction without affecting NF- $\kappa$ B activation. Related to Figure 1.**

(A) Cell density does not affect the activation of NF- $\kappa$ B induced by IL-1 $\beta$ . H358 cells (about  $2 \times 10^5$  cells) were seeded onto 10, 6 and 3.5 cm plates for low, medium or high cell densities, respectively, and treated with 10 ng/ml IL-1 $\beta$ . Cells were then harvested and analyzed by immunoblotting with the indicated antibodies.

(B) Cell density does not affect the induction of A20 and I $\kappa$ B $\alpha$  by IL-1 $\beta$  and the transcription of COX-1. H358 cells (about  $2 \times 10^5$  cells) were seeded onto 10, 6 and 3.5 cm plates for different cell confluences and treated with IL-1 $\beta$  for the indicated time. The mRNA levels of the indicated target genes were measured by qRT-PCR. n=3 independent experiments. Data are presented as mean  $\pm$  S.D.. n.s., not significant,  $P > 0.05$  (compared with low density group at the same induction time point), by unpaired, two-tailed Student's t-test.

(C, D) High cell density enhances the induction of COX-2 by DFO and serum starvation. H358 cells (about  $2 \times 10^5$  cells) were seeded onto 10, 6 and 3.5 cm plates for low, medium or high cell densities, respectively, and treated with 100  $\mu$ M DFO for the indicated time (C) or starved in serum-free media for 6 hours (D). Cells were then harvested and analyzed by immunoblotting with the indicated antibodies.

Abbreviations used: DFO, Deferoxamine mesylate salt.

**Supplementary Figure S2. YAP and TAZ inhibit the induction of COX-2. Related to Figure 2.**

(A) Hippo pathway does not affect the ERK1/2 or NF- $\kappa$ B signaling pathways. H358 cells were transfected with the indicated siRNAs and treated with IL-1 $\beta$  for the indicated duration of time. Cells were then lysed and analyzed by immunoblotting with the indicated antibodies.

(B, C) Hippo signaling regulates COX-2 induction by hypoxia and serum starvation. H358 cells were transfected with siRNAs against YAP/TAZ or LATS1/2 and treated with DFO (B) or starved in serum-free medium (C). Cell lysates were analyzed by immunoblotting with the indicated antibodies.

(D) The expression of COX-2 is repressed in the active YAP-induced liver tumors. Murine liver tumors induced by overexpression of constitutively active YAP(5SA) were subjected to immunohistochemistry staining for COX-2 and YAP. Positive staining for the antibodies is shown in brown. Nuclei were counterstained with hematoxylin shown in blue.

(E) New protein synthesis is not required for YAP/TAZ- inhibited COX-2 induction. H358 cells were transfected with control siRNA or siRNAs against LATS1/2 for 48 hours, treated with CHX for 6 hours and stimulated with IL-1 $\beta$  as indicated. Total RNAs were extracted and subjected to qRT-PCR for COX-2 (upper panel) and CTGF mRNA expression (lower panel). n=3 independent experiments. Data are presented as mean  $\pm$  S.D.. \* $P < 0.05$ ; \*\* $P < 0.01$  and \*\*\* $P < 0.001$  (compared with siNC group untreated or treated with CHX respectively at the same induction time point), by unpaired, two-tailed Student's t-test.

(F) YAP and TAZ do not repress the COX-2 induction through inducing miRNA. H358 cells were transfected with siRNAs against LATS1/2, DICER or both for 48 hours and treated with IL-1 $\beta$  for

2 hours. Cells were harvested and immunoblotted using the indicated antibodies.  
NC, Negative Control; DFO, Deferoxamine mesylate salt.

**Supplementary Figure S3. TEADs are indispensable for the suppression function of YAP/TAZ. Related to Figure 3.**

(A, B) TEADs are essential for the regulation of COX-2 induction by Hippo pathway. H358 cells were transfected with the indicated siRNAs for 48 hours and then starved in serum-free media (A) or treated with DFO for 6 or 12 hours (B) before harvesting for immunoblotting using the indicated antibodies.

(C) The efficiencies of TEAD1 and LATS1/2 knockdown. H358 cells were transfected with the indicated siRNAs and treated with IL-1 $\beta$  for the indicated time. Total RNAs were isolated and mRNA levels of COX-1, TEAD1, CTGF and LATS1 were measured by qRT-PCR. Quantification of COX-1 indicates its expression is not affected by the Hippo signaling. n=3 independent experiments. Data are presented as mean  $\pm$  S.D.. \*P < 0.05; \*\*\*P < 0.001 and n.s., not significant (P > 0.05), by unpaired, two-tailed Student's t-test.

(D) DNA-binding of TEAD1 is indispensable for the inhibition of COX-2 induction. Schematic representation of structure of TEAD1, which contains an N-terminal DNA-binding domain (DBD) and a C-terminal transcriptional activation domain (TAD). Residues 88 aa -101 aa refer to its DNA binding surface (upper panel). HeLa cells were transfected with Flag tagged TEAD1 or its DNA-binding domain-deficient mutant, stimulated with IL-1 $\beta$  for 2 hours and then collected for immunoblotting using the indicated antibodies (lower panel).

NC, Negative Control; DFO, Deferoxamine mesylate salt; aa, amino acid; DBD, DNA-Binding Domain; TAD, Transcriptional Activation Domain.

**Supplementary Figure S4. HDAC inhibitors reverse the suppression of COX-2 induction by YAP/TAZ. Related to Figure 4.**

(A) NaB rescues inhibition of COX-2 induction by LATS1/2 knockdown. H358 cells were transfected with the indicated siRNAs, followed by starved in serum-free media for 6 hours and treated with NaB for 6 more hours before cell harvesting. COX-2 induction was analyzed by immunoblotting.

(B) TSA reverses the inhibition of COX-2 induction by LATS1/2 knockdown. H358 cells were transfected with the indicated siRNAs, then starved in serum-free media for 6 hours and treated with TSA for another 6 hours before cell harvesting. Harvested cells were lysed and immunoblotted using the indicated antibodies.

(C) HDACs suppress the expression of COX-2. HeLa cells were transfected with Flag tagged HDACs as indicated. Cells were lysed and analyzed by western blots after treatment with IL-1 $\beta$  for 2 hours. The dotted black line indicates a splicing site on the PVDF membrane from the same gel.

(D) The siRNA-based knockdown efficiencies of HDACs and YAP/TAZ were measured by qRT-PCR. The expression of CTGF was used to indicate the knockdown efficiencies of YAP/TAZ. n=3 independent experiments. Data are presented as mean  $\pm$  S.D.. \*\*\*P < 0.001 (compared with siNC group), by unpaired, two-tailed Student's t-test.

NC, Negative Control; NaB, Sodium Butyrate; TSA, Trichostatin A.

**Supplementary Figure S5. The viability of H358 cells is not affected by stable expression of COX-2 and YAP(5SA). Related to Figure 6.**

(A) Generation of H358 cell lines expressing GFP, YAP(5SA), COX-2 or both YAP(5SA) and COX-2. H358 cell lines stably expressing EGFP, YAP(5SA), COX-2 or YAP(5SA) and COX-2 were generated by infection with recombinant lentiviruses and puromycin selection. The four cell lines were treated with IL-1 $\beta$  for the indicated time and then harvested for immunoblotting using the indicated antibodies.

(B) Comparable viability and proliferation among the H358 stable cell lines. Proliferation analysis was conducted by MTT assay with or without IL-1 $\beta$  treatment. n=3 independent experiments. Data are presented as mean  $\pm$  S.D.. n.s., not significant ( $P > 0.05$ ), by unpaired, two-tailed Student's t-test.

**Supplementary Figure S6. Numbers of genes suppressed by active YAP are related to cell migration, angiogenesis or inflammatory responses. Related to Figure 7.**

(A, B) The typical target genes of NF- $\kappa$ B signaling are upregulated or not regulated by YAP(5SA). A list of target genes of NF- $\kappa$ B that are not regulated or upregulated by YAP(5SA) was presented. Gene selection criteria: upregulated: log<sub>2</sub> ratio  $\geq 1$ , unregulated: log<sub>2</sub> ratio between -1 and 1 (A). GFP-expressing or YAP(5SA)-expressing H358 cells were treated with vehicle, IL-1 $\beta$  or TNF $\alpha$ . RNAs were extracted for qRT-PCR analysis. n=3 independent experiments. Data are presented as mean  $\pm$  S.D.. \*\*\* $P < 0.001$  and n.s., not significant ( $P > 0.05$ ), by unpaired, two-tailed Student's t-test (B).

(C, D) YAP(5SA) also regulates the expression of non-NF- $\kappa$ B target genes. The heatmap represents the intensity of genes, which are downregulated (C) or upregulated (D) by YAP(5SA), but not proinflammatory factors. The values on the right are fold changes in log<sub>2</sub> of corresponding genes among compared groups.

(E) KEGG pathway analysis shows the anti-microbial responses-related pathways are significantly regulated by activated YAP. H358 cells stably expressing EGFP, or YAP(5SA) were treated with TNF- $\alpha$ , IL-1 $\beta$  or vehicle for 1 hour and used for RNA extraction for whole-genome expression microarray analysis. The 15 most significant enriched KEGG pathways by differentially expressed genes between YAP(5SA)-expressing and GFP-expressing cells enriched were listed. The differentially expressed genes were listed in Table S1. Gene selection criteria: log<sub>2</sub> ratio  $\geq 1$  or  $\leq -1$ .  $P < 0.05$ .

(F) Suppressed genes by YAP(5SA) related to cell migration, angiogenesis or inflammatory responses through GO analysis in all three compared groups (vehicle, IL-1 $\beta$  and TNF- $\alpha$ ) are listed.  $P < 0.05$ .

**Figure S1**

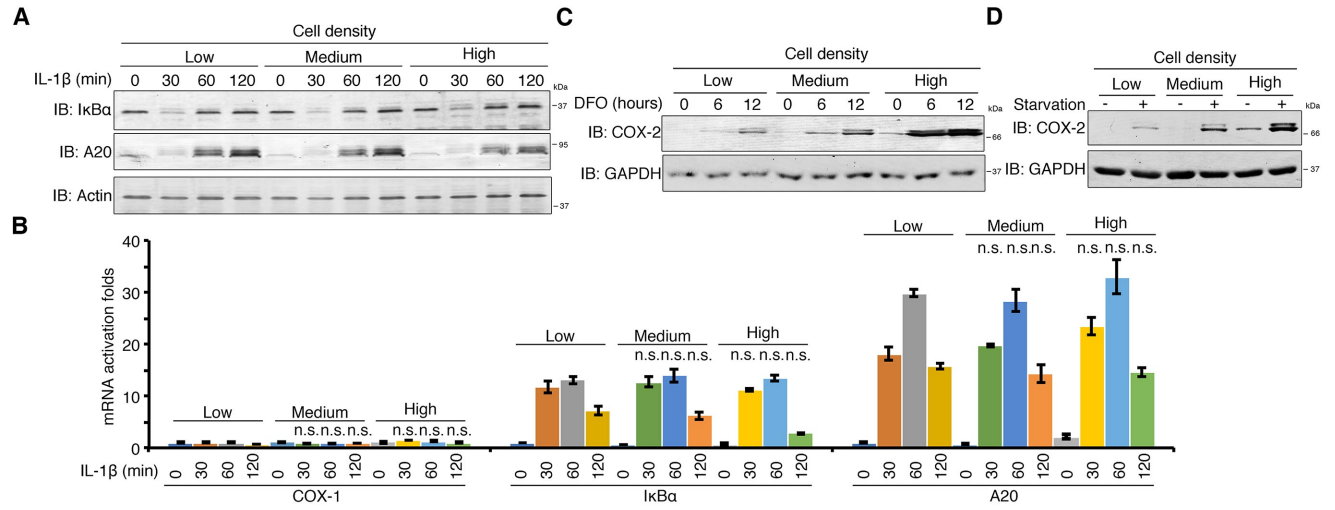

**Figure S2**

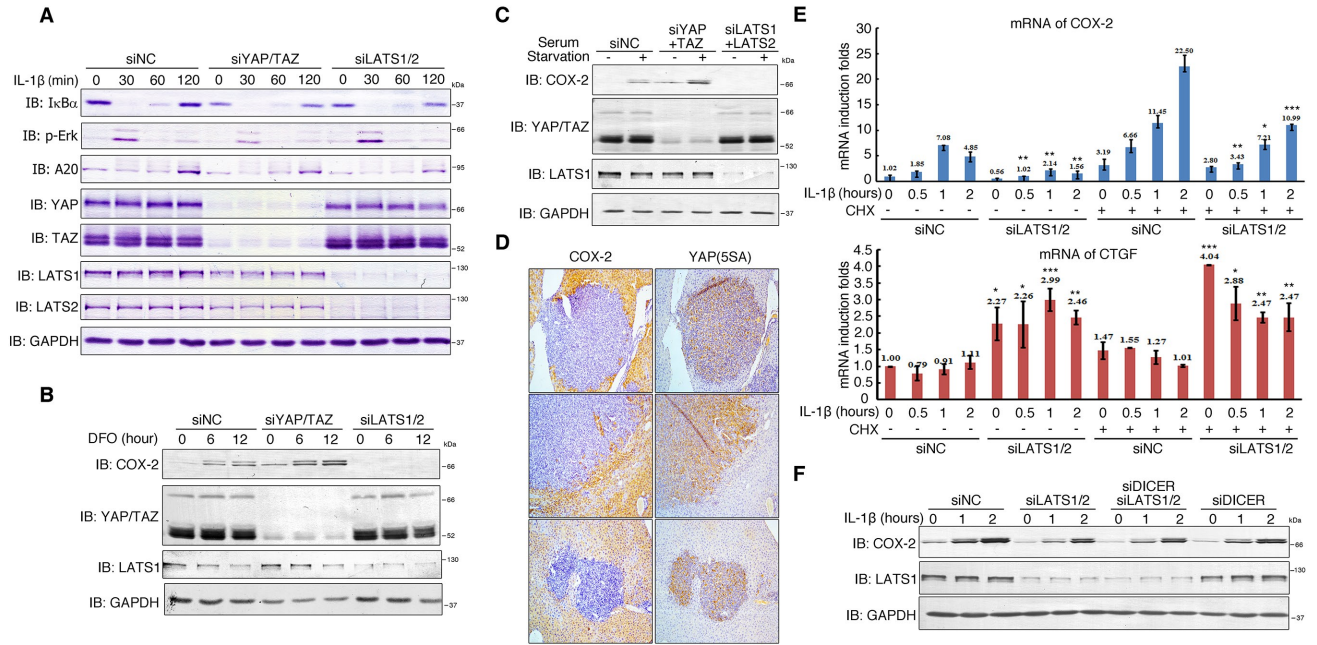

**Figure S3**

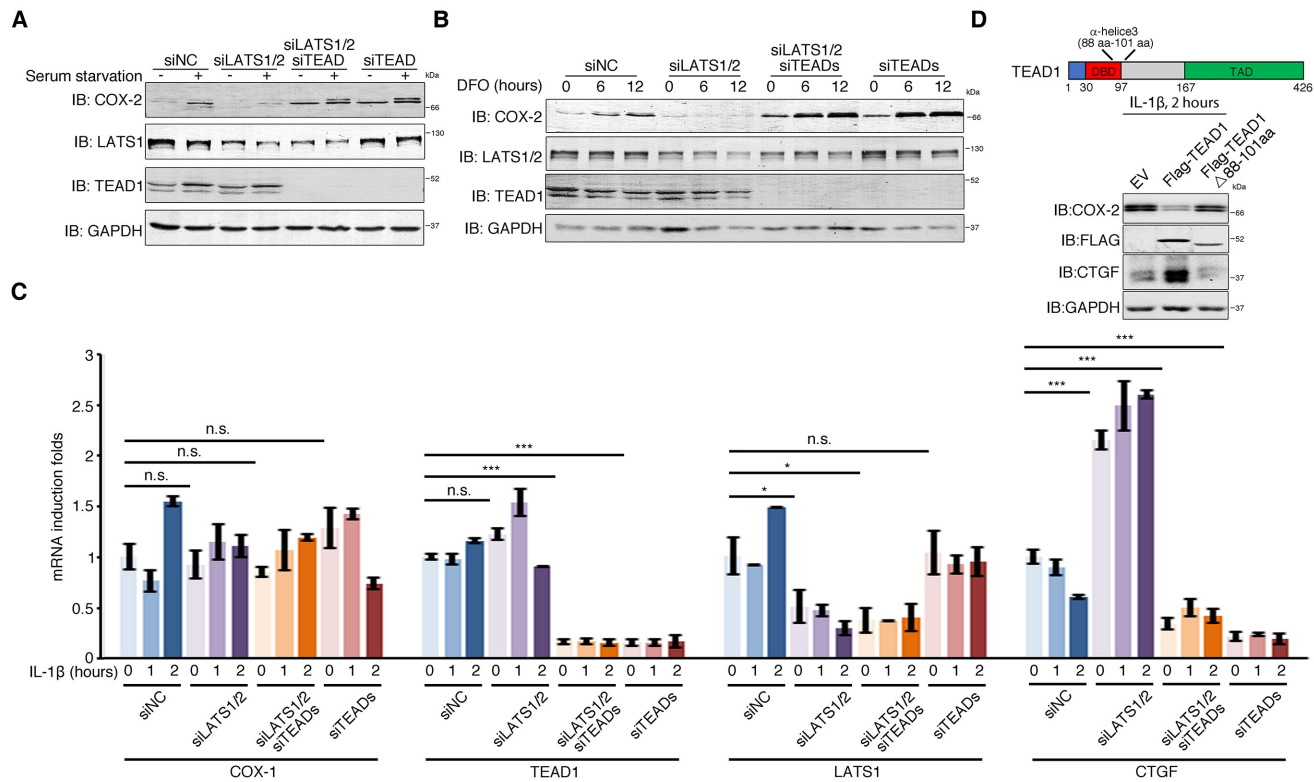



**Figure S4**

**A**

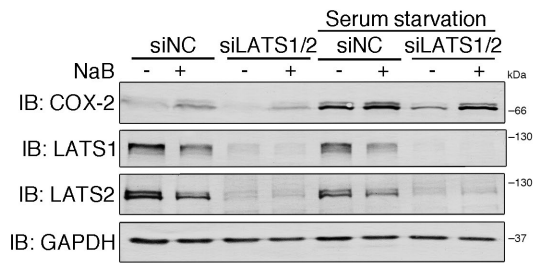

**B**

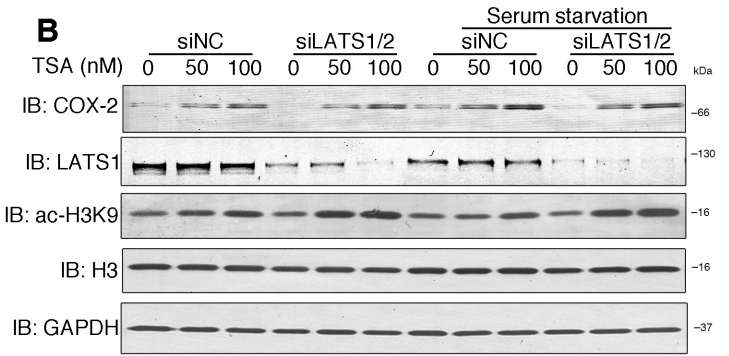

**C**

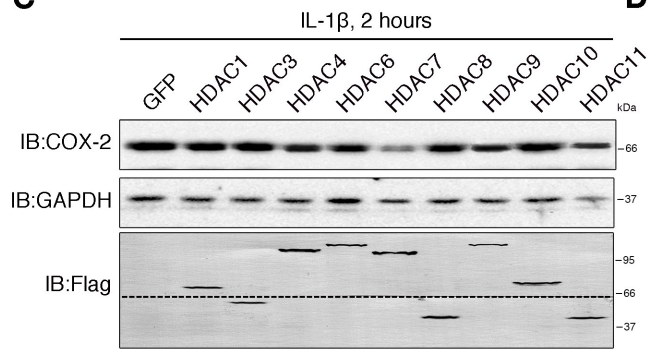

**D**

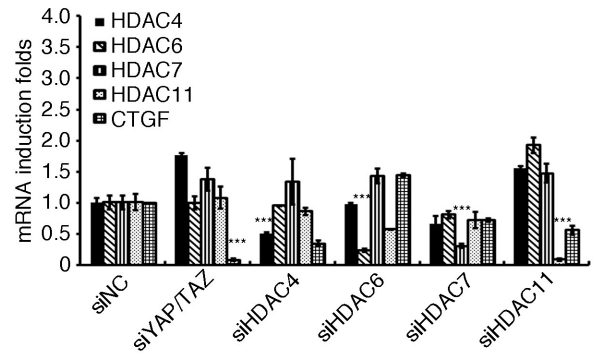

Figure S5

**A**

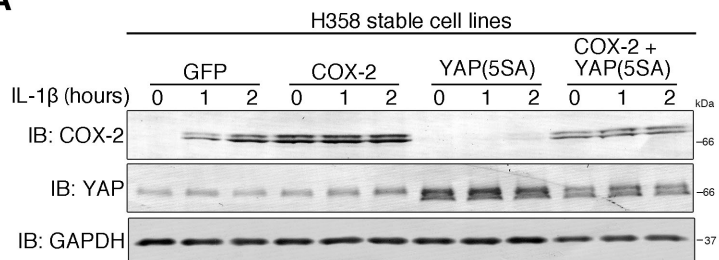

**B**

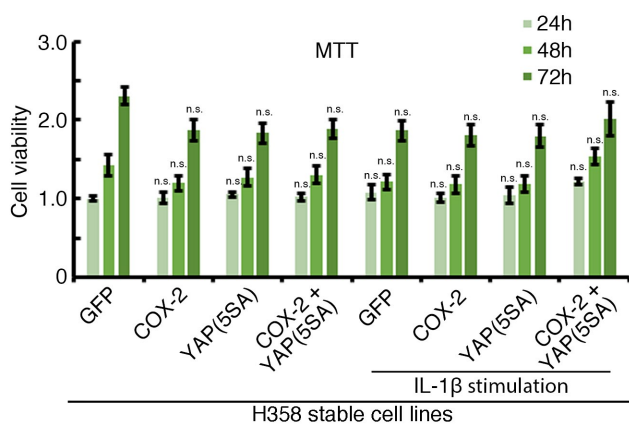

Figure S6

A

|                                                     | Gene symbol |
|-----------------------------------------------------|-------------|
| NF- $\kappa$ B target genes<br>not regulated by YAP | CCL4L       |
|                                                     | TRAF1       |
|                                                     | TRAF2       |
|                                                     | NFKB2       |
|                                                     | RIPK1       |
|                                                     | CXCL2       |
|                                                     | PLAU        |
|                                                     | BCL2A1      |
|                                                     | NFKB1       |
|                                                     | LTB         |
|                                                     | NFKBIA      |
|                                                     | TNFAIP3     |
|                                                     | IFNGR2      |
|                                                     | CXCL1       |
|                                                     | IRAK2       |
|                                                     | IL32A       |
| ZC3H12A                                             |             |
| NFKBIZ                                              |             |
| NF- $\kappa$ B target genes<br>upregulated by YAP   | PTX3        |
|                                                     | IL6         |

C

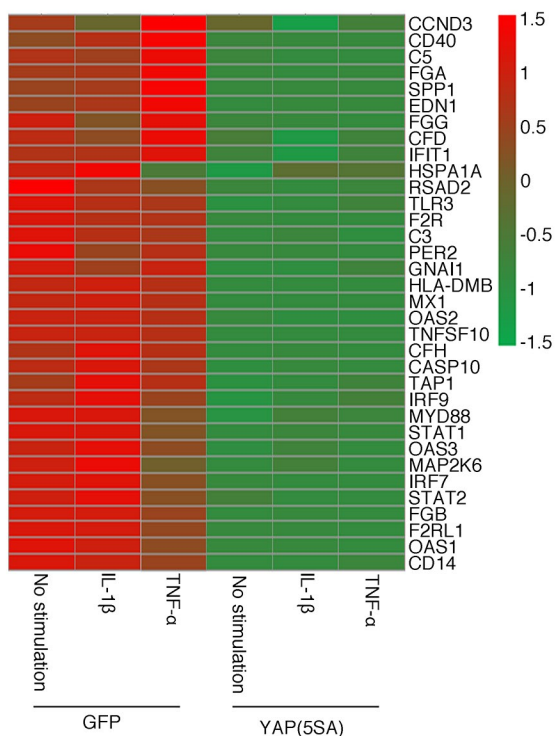

B

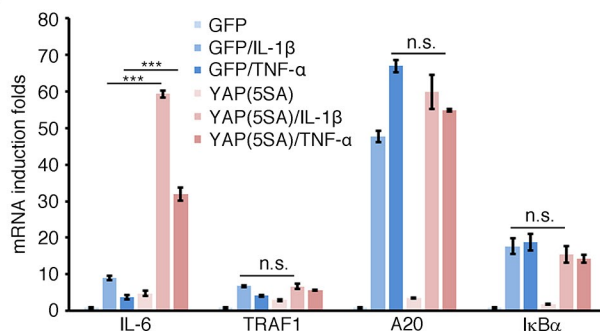

D

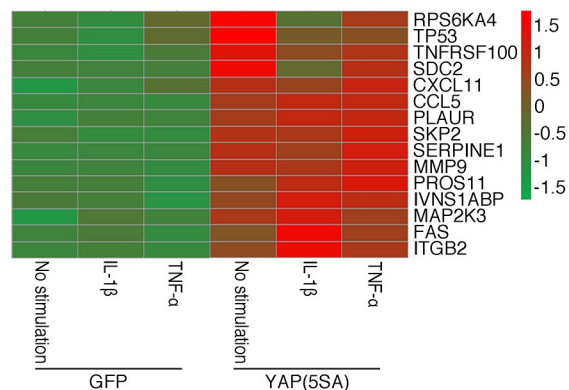

F

| Function                                                           | Gene symbol |
|--------------------------------------------------------------------|-------------|
| Positive regulation of cell migration                              | CCL26       |
|                                                                    | EDN1        |
|                                                                    | F2R         |
|                                                                    | F2RL1       |
|                                                                    | SEMA4G      |
|                                                                    | BMP4        |
|                                                                    | PTP4A1      |
| PDGFD                                                              |             |
| Positive regulation of substrate adhesion-dependent cell spreading | ADGRG1      |
|                                                                    | TNF         |
|                                                                    | VAV3        |
|                                                                    | FGB         |
| Regulation of angiogenesis                                         | FZD8        |
|                                                                    | CYP1B1      |
|                                                                    | JAG1        |
|                                                                    | TBX1        |
|                                                                    | NRCAM       |
| PLXND1                                                             |             |
| Prostaglandin metabolic process                                    | PTGR1       |
|                                                                    | HPGD        |
|                                                                    | AKRIC3      |
|                                                                    | PTGES       |
|                                                                    |             |

E

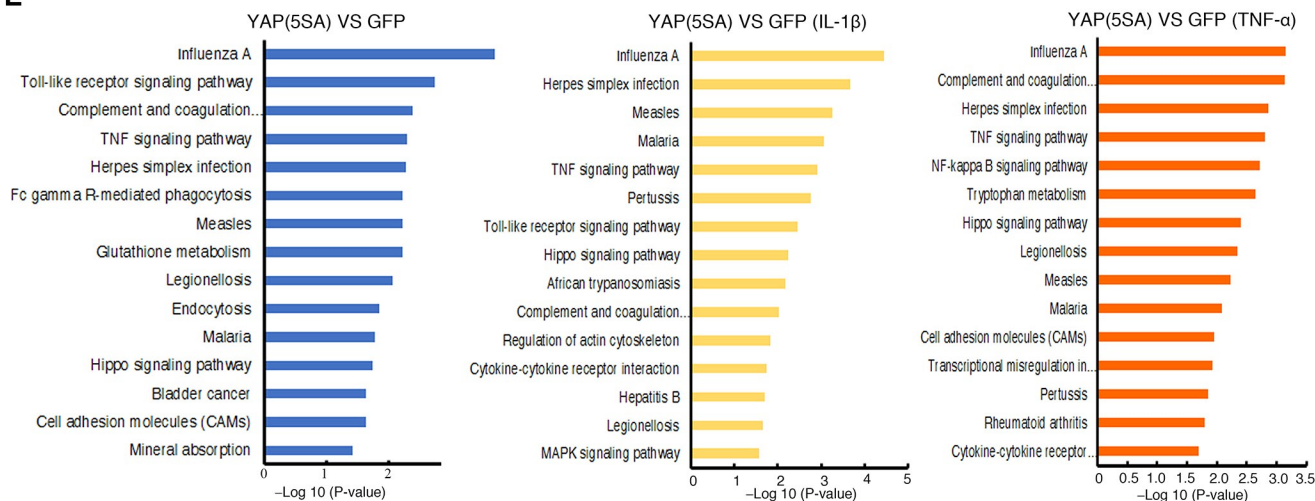

Supplement: supp_RA118.004251_138536_2_supp_216884_pghkf5.pdf [file supp_RA118.004251_138536_2_supp_216884_pghkf5.pdf]
